# Supplementary material for: Draft Genomes of Anopheles cracens and Anopheles maculatus: Comparison of Simian Malaria and Human Malaria Vectors in Peninsular Malaysia
Source: PLoS One. 2016 Jun 27;11(6):e0157893. doi: 10.1371/journal.pone.0157893 (PMC4922560; doi:10.1371/journal.pone.0157893)
Supplement: S10 Table — (XLSX) [file pone.0157893.s010.xlsx]

## Sheet: S1
S10 Table. InterProScan annotations for PSGs of An. maculatus.
IPRID	IPRTitle	P-value	Bonferroni-adjusted P-value	x	y	n	N	EnrichDirect	GeneIDs
IPR001747	Lipid transport protein, N-terminal	0.000208782	0.00686447	2	11	36	18117	Over	anopheles.maculates_GLEAN_10016841 anopheles.maculates_GLEAN_10010282
IPR000031	N5-carboxyaminoimidazole ribonucleotide mutase PurE domain	0.00198708	0.00686447	1	1	36	18117	Over	anopheles.maculates_GLEAN_10019922
IPR000702	Ribosomal protein L6	0.00198708	0.00686447	1	1	36	18117	Over	anopheles.maculates_GLEAN_10022166
IPR001636	SAICAR synthetase	0.00198708	0.00686447	1	1	36	18117	Over	anopheles.maculates_GLEAN_10019922
IPR002359	Ribosomal protein L6, conserved site-2	0.00198708	0.00686447	1	1	36	18117	Over	anopheles.maculates_GLEAN_10022166
IPR003864	Domain of unknown function DUF221	0.00198708	0.00686447	1	1	36	18117	Over	anopheles.maculates_GLEAN_10007139
IPR005079	Peptidase C45, acyl-coenzyme A:6-aminopenicillanic acid acyl-transferase	0.00198708	0.00686447	1	1	36	18117	Over	anopheles.maculates_GLEAN_10008128
IPR005201	Glycoside hydrolase, family 85	0.00198708	0.00686447	1	1	36	18117	Over	anopheles.maculates_GLEAN_10017155
IPR005772	ATPase, V1 complex, subunit F, eukaryotic	0.00198708	0.00686447	1	1	36	18117	Over	anopheles.maculates_GLEAN_10009032
IPR007720	N-acetylglucosaminyl transferase component	0.00198708	0.00686447	1	1	36	18117	Over	anopheles.maculates_GLEAN_10016437
IPR008631	Glycogen synthase	0.00198708	0.00686447	1	1	36	18117	Over	anopheles.maculates_GLEAN_10014131
IPR008698	NADH:ubiquinone oxidoreductase, B18 subunit	0.00198708	0.00686447	1	1	36	18117	Over	anopheles.maculates_GLEAN_10016802
IPR011236	Protein phosphatase 5	0.00198708	0.00686447	1	1	36	18117	Over	anopheles.maculates_GLEAN_10018771
IPR013235	PPP domain	0.00198708	0.00686447	1	1	36	18117	Over	anopheles.maculates_GLEAN_10018771
IPR018236	SAICAR synthetase, conserved site	0.00198708	0.00686447	1	1	36	18117	Over	anopheles.maculates_GLEAN_10019922
IPR019010	Eukaryotic translation initiation factor 3 (eIF3), subunit 6, N-terminal	0.00198708	0.00686447	1	1	36	18117	Over	anopheles.maculates_GLEAN_10011962
IPR019035	Mediator complex, subunit Med12	0.00198708	0.00686447	1	1	36	18117	Over	anopheles.maculates_GLEAN_10025984
IPR019183	N-acetyltransferase B complex, non-catalytic subunit	0.00198708	0.00686447	1	1	36	18117	Over	anopheles.maculates_GLEAN_10015141
IPR019266	Ribosomal protein S27, mitochondrial	0.00198708	0.00686447	1	1	36	18117	Over	anopheles.maculates_GLEAN_10008161
IPR021990	Mediator complex, subunit Med12, LCEWAV-domain	0.00198708	0.00686447	1	1	36	18117	Over	anopheles.maculates_GLEAN_10025984
IPR024738	Transcriptional coactivator SAGA-type complex, Ada1/Tada1	0.00198708	0.00686447	1	1	36	18117	Over	anopheles.maculates_GLEAN_10013329
IPR000091	Huntingtin	0.00397033	0.0116056	1	2	36	18117	Over	anopheles.maculates_GLEAN_10011850
IPR014811	Domain of unknown function DUF1785	0.00397033	0.0116056	1	2	36	18117	Over	anopheles.maculates_GLEAN_10014604
IPR020040	Ribosomal protein L6, alpha-beta domain	0.00397033	0.0116056	1	2	36	18117	Over	anopheles.maculates_GLEAN_10022166
IPR021843	Protein of unknown function DUF3437	0.00397033	0.0116056	1	2	36	18117	Over	anopheles.maculates_GLEAN_10024789
IPR000796	Aspartate/other aminotransferase	0.00594974	0.0145865	1	3	36	18117	Over	anopheles.maculates_GLEAN_10010316
IPR001519	Ferritin	0.00594974	0.0145865	1	3	36	18117	Over	anopheles.maculates_GLEAN_10009045
IPR005637	TAP, C-terminal	0.00594974	0.0145865	1	3	36	18117	Over	anopheles.maculates_GLEAN_10010558
IPR008331	Ferritin/DPS protein domain	0.00594974	0.0145865	1	3	36	18117	Over	anopheles.maculates_GLEAN_10009045
IPR004838	Aminotransferases, class-I, pyridoxal-phosphate-binding site	0.00792533	0.0182523	1	4	36	18117	Over	anopheles.maculates_GLEAN_10010316
IPR017941	Rieske [2Fe-2S] iron-sulphur domain	0.00792533	0.0182523	1	4	36	18117	Over	anopheles.maculates_GLEAN_10003443
IPR000649	Initiation factor 2B-related	0.0118651	0.0265219	1	6	36	18117	Over	anopheles.maculates_GLEAN_10021827
IPR002075	Nuclear transport factor 2	0.0138292	0.028406	1	7	36	18117	Over	anopheles.maculates_GLEAN_10010558
IPR002554	Protein phosphatase 2A, regulatory B subunit, B56	0.0138292	0.028406	1	7	36	18117	Over	anopheles.maculates_GLEAN_10020098
IPR015255	Vitellinogen, open beta-sheet	0.0138292	0.028406	1	7	36	18117	Over	anopheles.maculates_GLEAN_10010282
IPR000917	Sulfatase	0.0177462	0.0328953	1	9	36	18117	Over	anopheles.maculates_GLEAN_10011000
IPR013632	DNA recombination and repair protein Rad51, C-terminal	0.0177462	0.0328953	1	9	36	18117	Over	anopheles.maculates_GLEAN_10012681
IPR024607	Sulfatase, conserved site	0.0177462	0.0328953	1	9	36	18117	Over	anopheles.maculates_GLEAN_10011000
IPR003165	Stem cell self-renewal protein Piwi	0.0196989	0.0356457	1	10	36	18117	Over	anopheles.maculates_GLEAN_10014604
IPR019734	Tetratricopeptide repeat	0.0215116	0.036561	2	114	36	18117	Over	anopheles.maculates_GLEAN_10018771 anopheles.maculates_GLEAN_10023973
IPR002035	von Willebrand factor, type A	0.021648	0.036561	1	11	36	18117	Over	anopheles.maculates_GLEAN_10020401
IPR003100	Argonaute/Dicer protein, PAZ	0.021648	0.036561	1	11	36	18117	Over	anopheles.maculates_GLEAN_10014604
IPR006186	Serine/threonine-specific protein phosphatase/bis(5-nucleosyl)-tetraphosphatase	0.0255347	0.0421878	1	13	36	18117	Over	anopheles.maculates_GLEAN_10018771
